# Supplementary material for: Morphology and properties of silica-based coatings with different functionalities for Fe3O4, ZnO and Al2O3 nanoparticles
Source: Royal Society of Chemistry journal article supplement (doi:10.1039/c5ra04452a), 2015-01-01
Supplement: c5ra04452a1.pdf [file c5ra04452a1.pdf]

# Morphology and properties of silica-based coatings with different functionalities for Fe<sub>3</sub>O<sub>4</sub>, ZnO and Al<sub>2</sub>O<sub>3</sub> nanoparticles

*D. Liu, A. M. Pourrahimi, L. K. H. Pallon, R. L. Andersson, M. S. Hedenqvist,  
U. W. Gedde, R. T. Olsson\**

KTH-Royal Institute of Technology, School of Chemical Science and Engineering,  
Fibre and Polymer Technology SE-100 44 Stockholm, Sweden

## **Corresponding Author**

Phone: 46 73 2701868. Fax: 46 8 7906036. E-mail address: [rols@kth.se](mailto:rols@kth.se) .

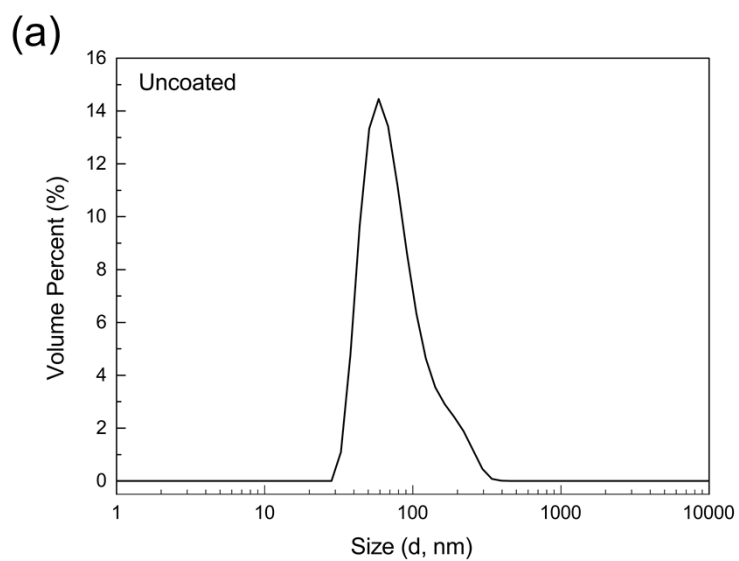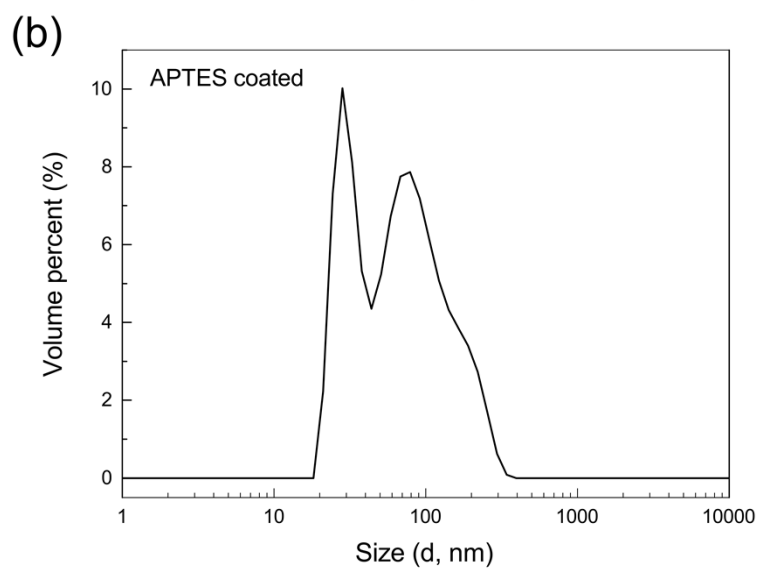

**Fig. S1.** Dynamic light scattering (DLS) of (a) uncoated Fe<sub>3</sub>O<sub>4</sub> nanoparticles, (b) APTES coated Fe<sub>3</sub>O<sub>4</sub> nanoparticles

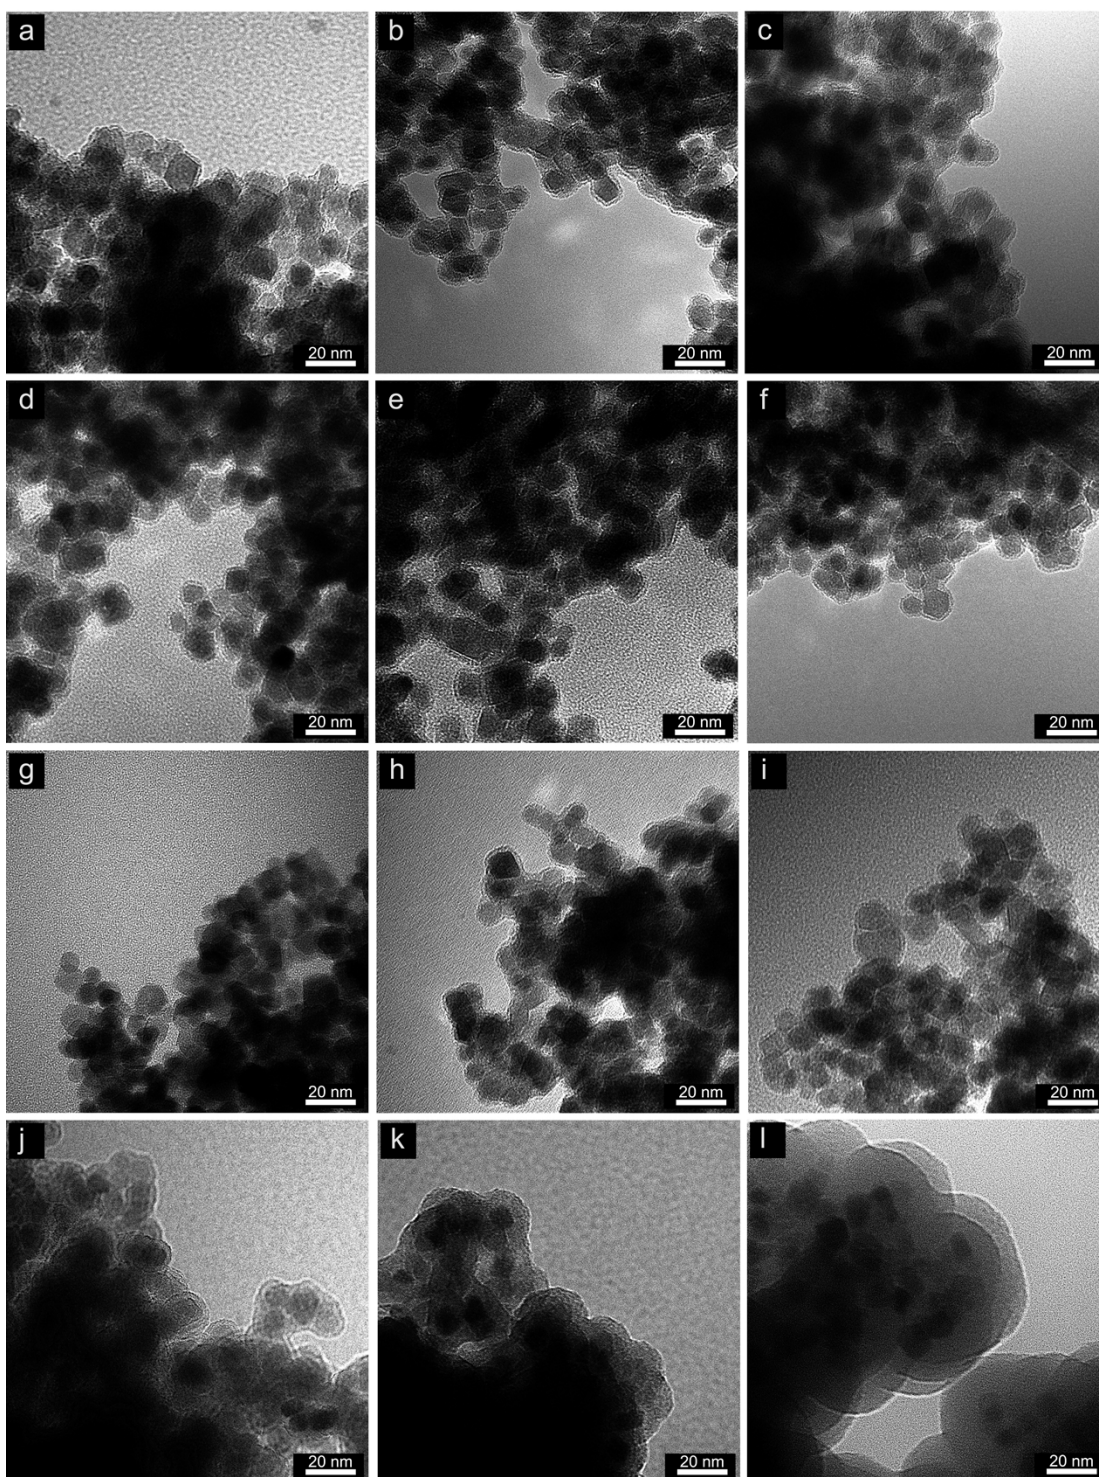

**Fig. S2.** TEM images of functional silane coated  $\text{Fe}_3\text{O}_4$  nanoparticles. (a)-(c) APTES coating with the ammonia hydroxide amount of 50, 85, 190  $\mu\text{L}$ , respectively; (d)-(f) MTES coating with the ammonia hydroxide amount of 50, 85, 190  $\mu\text{L}$ , respectively; (g)-(i) OTES coating with the ammonia hydroxide amount of 50, 85, 190  $\mu\text{L}$ , respectively; (j)-(l) TEOS coating with the ammonia hydroxide amount of 50, 85, 190  $\mu\text{L}$  respectively. All the scale bars in the TEM images are 20 nm.

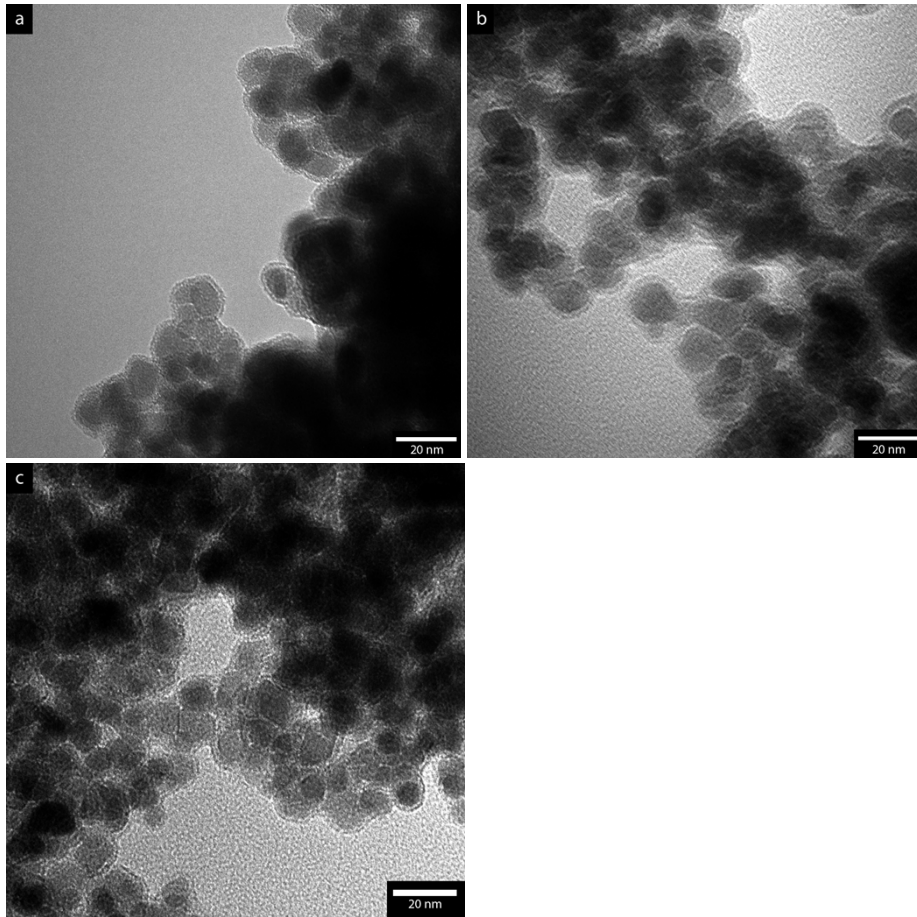

**Fig. S3.** Fe<sub>3</sub>O<sub>4</sub> nanoparticles coated the silane volume of 0.36 mL, (a) APTES, (b) MTMS, (c) OTES.

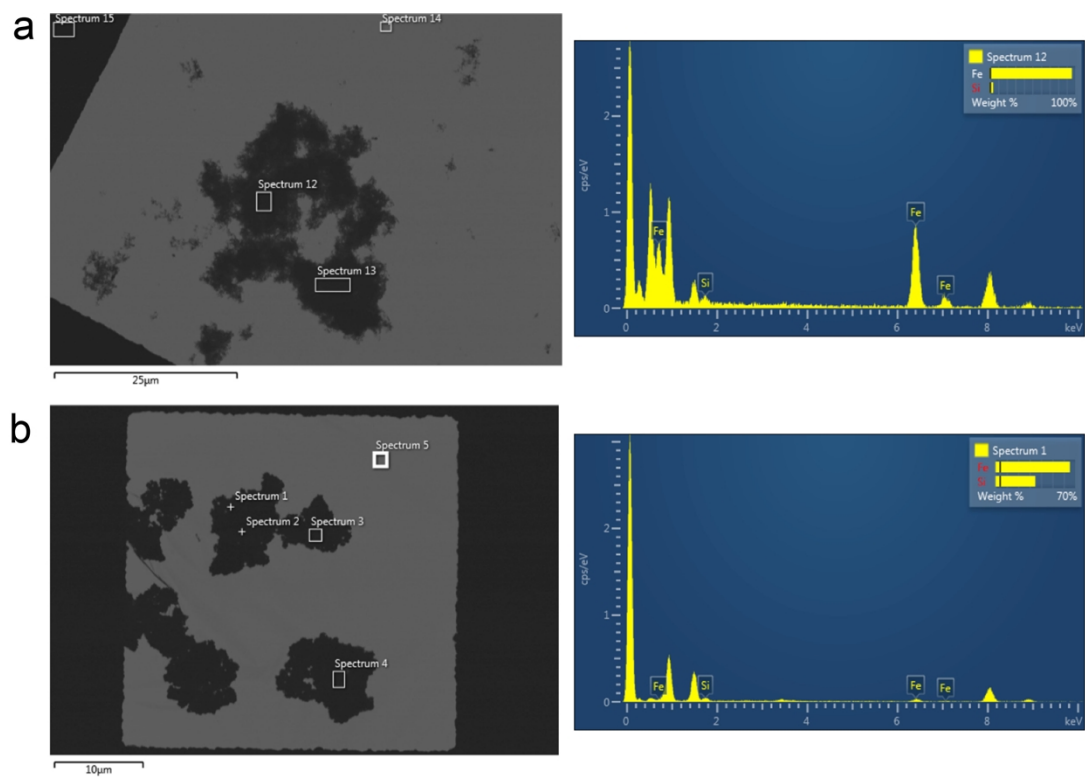

Fig. S4. SEM image and corresponding EDS of (a) OTES coated  $\text{Fe}_3\text{O}_4$  nanoparticles; (b) TEOS coated  $\text{Fe}_3\text{O}_4$  nanoparticles. Si/Fe ratio: 0.022 and 1.8 (average), respectively.
